# Supplementary material
Source: MDPI journal article supplement (https://www.mdpi.com/2227-9040/8/3/58)
Supplement: s1 [file s1]

# Electrochemical Sodium Ion Sensor Based on Silver Nanoparticles/Graphene Oxide Nanocomposite for Food Application

Pranlekha Traiwatcharanon <sup>1</sup>, Wilai Siriwatcharapiboon <sup>2</sup> and Chatchawal Wongchoosuk <sup>1,\*</sup>

<sup>1</sup> Department of Physics, Faculty of Science, Kasetsart University, Bangkok 10900, Thailand.

<sup>2</sup> Department of Chemistry and Center of Excellence for Innovation in Chemistry, Faculty of Science, Kasetsart University, Bangkok, 10900, Thailand.

\* Corresponding author >> E-mail: [chatchawal.w@ku.ac.th](mailto:chatchawal.w@ku.ac.th)

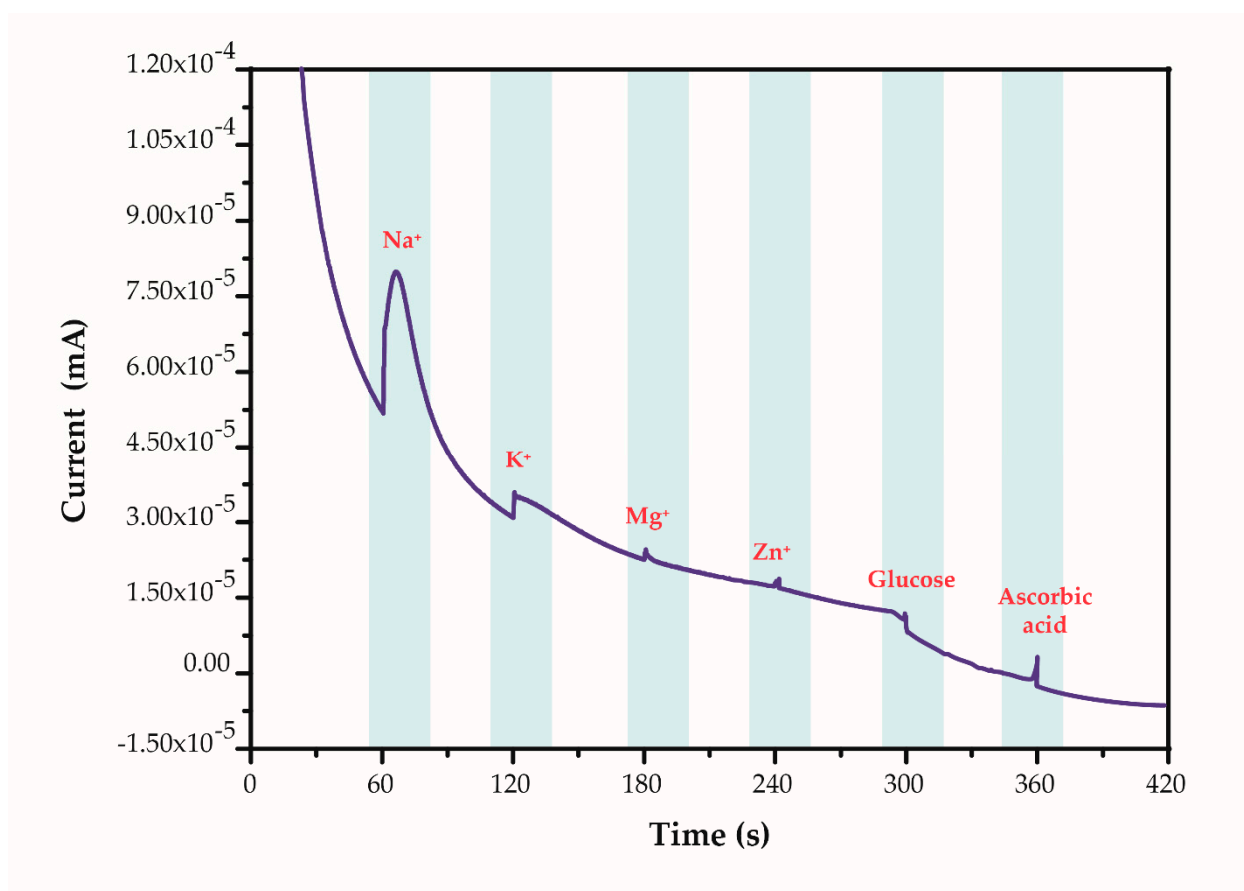

**Figure S1.** Chronoamperometric current response of AgNPs/GO/SPE sensor for addition of  $\text{Na}^+$  in presence of potential food interfering species at a constant potential of +0.2 V.

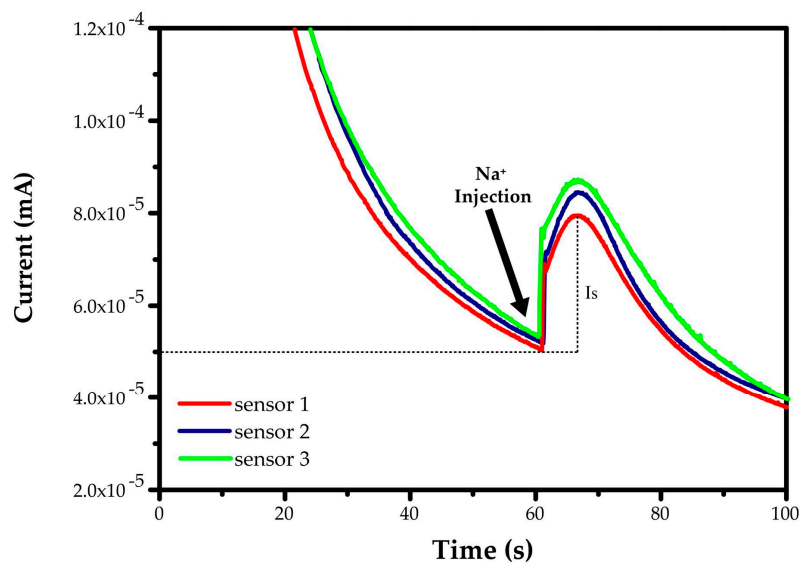

**Figure S2.** Chronoamperometric current response of three independent AgNPs/GO/SPE sensors before and after Na<sup>+</sup> injection at a constant potential of +0.2 V.

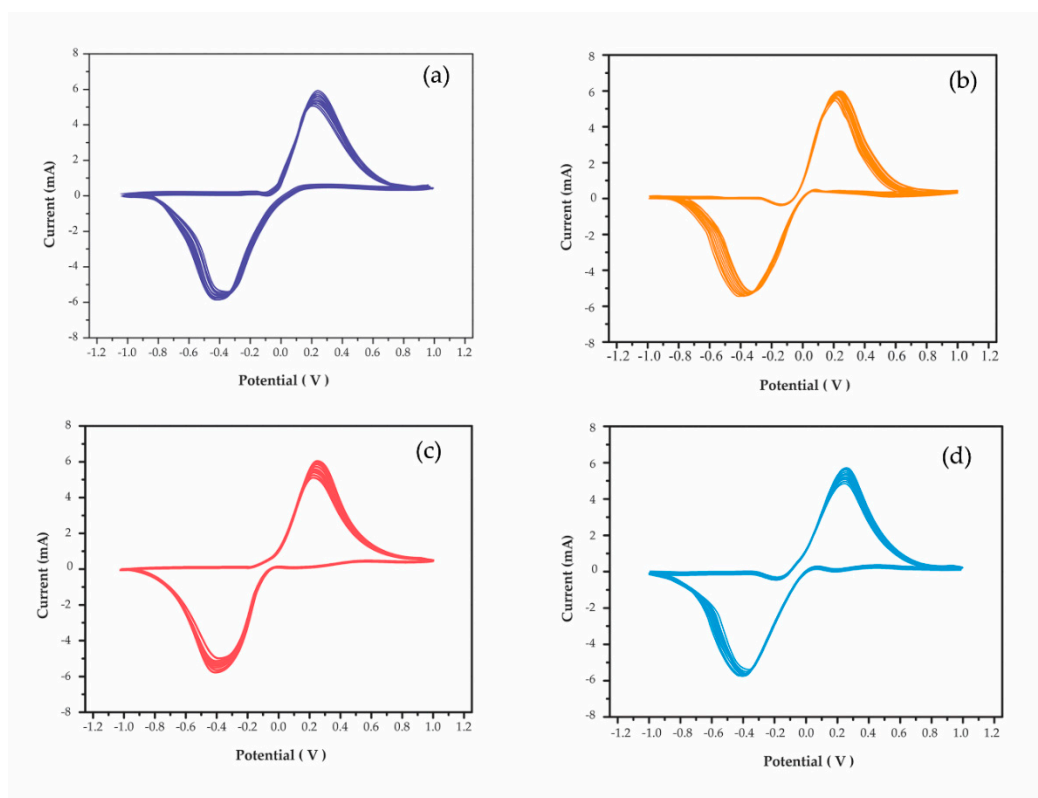

**Figure S3.** Cyclic voltammograms of four independent AgNPs/GO/SPE sensors as a function of the number of cycles.

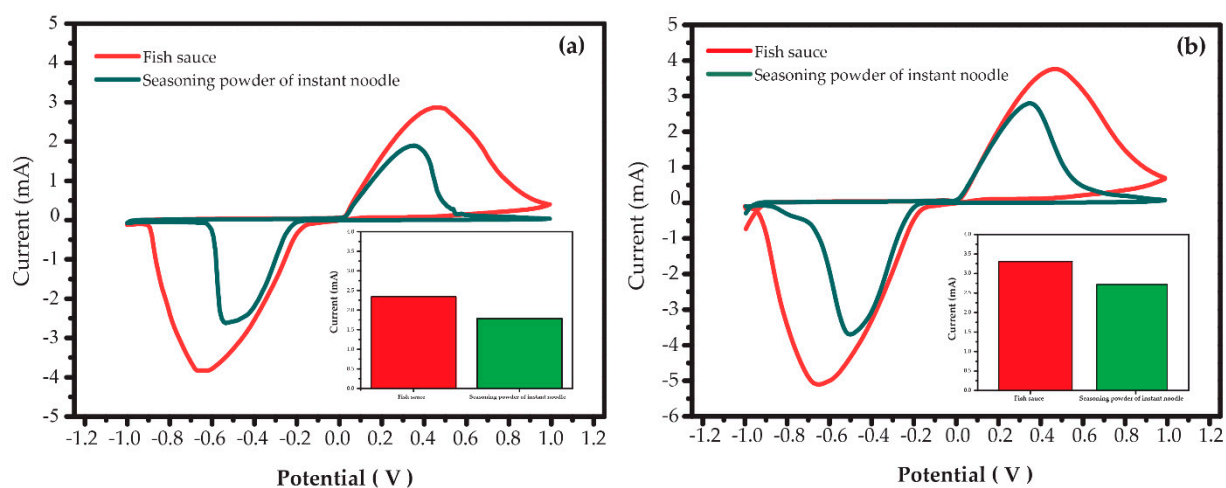

**Figure S4.** Cyclic voltammograms of AgNPs/GO/SPE sensors in (a) real samples and (b) spiked samples (real samples with addition of 50 mM Na<sup>+</sup>). The insets show the relative anodic peak currents of AgNPs/GO/SPE sensors.
